# Supplementary material for: Macro-/mesoporous titania thin films: analysing the effect of pore architecture on photocatalytic activity using high-throughput screening
Source: Royal Society of Chemistry journal article supplement (doi:10.1039/c5ta08959j), 2015-01-01
Supplement: c5ta08959j1.pdf [file c5ta08959j1.pdf]

## Electronic Supporting information (ESI)

# Macro-/mesoporous titania thin films: Analysing the effect of pore architecture on photocatalytic activity using high-throughput screening

Natalita M. Nursam,<sup>ab</sup> Xingdong Wang<sup>b</sup> and Rachel A. Caruso<sup>ab\*</sup>

<sup>a</sup>CSIRO Manufacturing, Private Bag 10, Clayton South, Victoria 3169, Australia

<sup>b</sup>Particulate Fluids Processing Centre, School of Chemistry, The University of Melbourne, Melbourne, Victoria 3010, Australia. Fax: +61 3 9347 5180; Tel: +61 3 8344 7146

E-mail: [rcaruso@unimelb.edu.au](mailto:rcaruso@unimelb.edu.au)

**Table S1.** Composition of the reagents used during sol-gel synthesis.

| Sample            | Solution composition (molar ratio) |     |                  |         | Polymer mass (g) |     |      |
|-------------------|------------------------------------|-----|------------------|---------|------------------|-----|------|
|                   | TBT                                | DEA | H <sub>2</sub> O | Ethanol | PEG              | PVP | F127 |
| Control           | 1                                  | 1   | 1                | 25      | 0                | 0   | 0    |
| 1PEG-0PVP-0F127   | 1                                  | 1   | 1                | 25      | 1.0              | 0   | 0    |
| 2PEG-0PVP-0F127   | 1                                  | 1   | 1                | 25      | 2.0              | 0   | 0    |
| 3PEG-0PVP-0F127   | 1                                  | 1   | 1                | 25      | 3.0              | 0   | 0    |
| 1PEG-0.5PVP-0F127 | 1                                  | 1   | 1                | 25      | 1.0              | 0.5 | 0    |
| 1PEG-1PVP-0F127   | 1                                  | 1   | 1                | 25      | 1.0              | 1.0 | 0    |
| 1PEG-1.5PVP-0F127 | 1                                  | 1   | 1                | 25      | 1.0              | 1.5 | 0    |
| 1PEG-2PVP-0F127   | 1                                  | 1   | 1                | 25      | 1.0              | 2.0 | 0    |
| 2PEG-0.5PVP-0F127 | 1                                  | 1   | 1                | 25      | 2.0              | 0.5 | 0    |
| 2PEG-1PVP-0F127   | 1                                  | 1   | 1                | 25      | 2.0              | 1.0 | 0    |
| 2PEG-1.5PVP-0F127 | 1                                  | 1   | 1                | 25      | 2.0              | 1.5 | 0    |
| 2PEG-2PVP-0F127   | 1                                  | 1   | 1                | 25      | 2.0              | 2.0 | 0    |
| 3PEG-0.5PVP-0F127 | 1                                  | 1   | 1                | 25      | 3.0              | 0.5 | 0    |
| 3PEG-1PVP-0F127   | 1                                  | 1   | 1                | 25      | 3.0              | 1.0 | 0    |
| 3PEG-1.5PVP-0F127 | 1                                  | 1   | 1                | 25      | 3.0              | 1.5 | 0    |
| 3PEG-2PVP-0F127   | 1                                  | 1   | 1                | 25      | 3.0              | 2.0 | 0    |
| 1PEG-1PVP-0.5F127 | 1                                  | 1   | 1                | 25      | 1.0              | 1.0 | 0.5  |
| 1PEG-1PVP-1F127   | 1                                  | 1   | 1                | 25      | 1.0              | 1.0 | 1.0  |
| 1PEG-1PVP-1.5F127 | 1                                  | 1   | 1                | 25      | 1.0              | 1.0 | 1.5  |
| 1PEG-1PVP-2F127   | 1                                  | 1   | 1                | 25      | 1.0              | 1.0 | 2.0  |

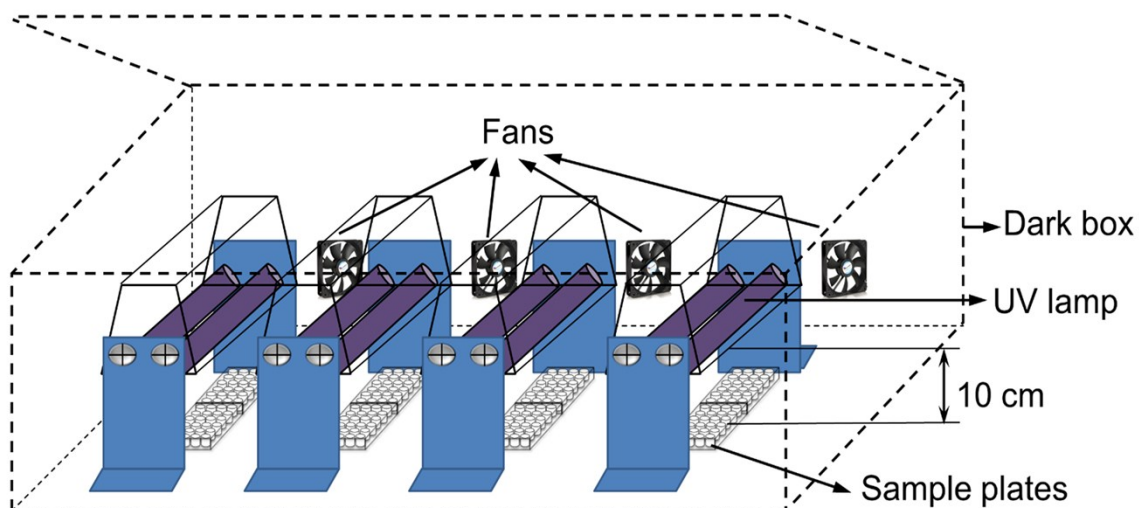

(a)

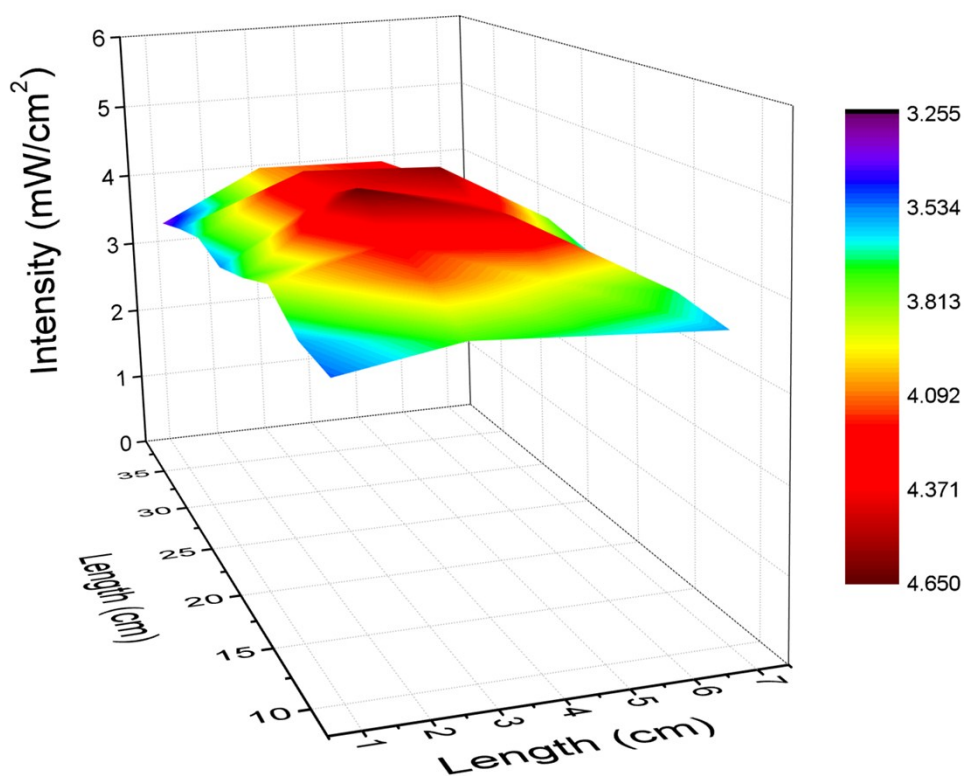

(b)

**Fig. S1.** (a) Schematic illustration displaying the high-throughput photocatalysis screening setup and (b) mapping of the light intensity typically measured in each of the irradiation areas.

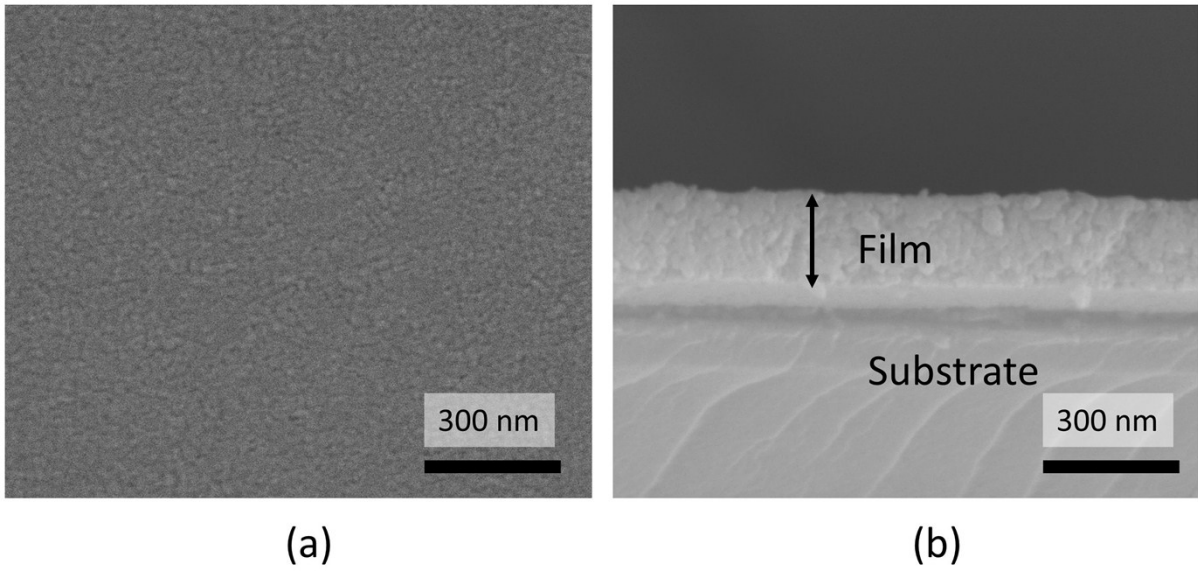

**Fig. S2.** SEM images showing the (a) surface and (b) cross-section morphology of the control sample.

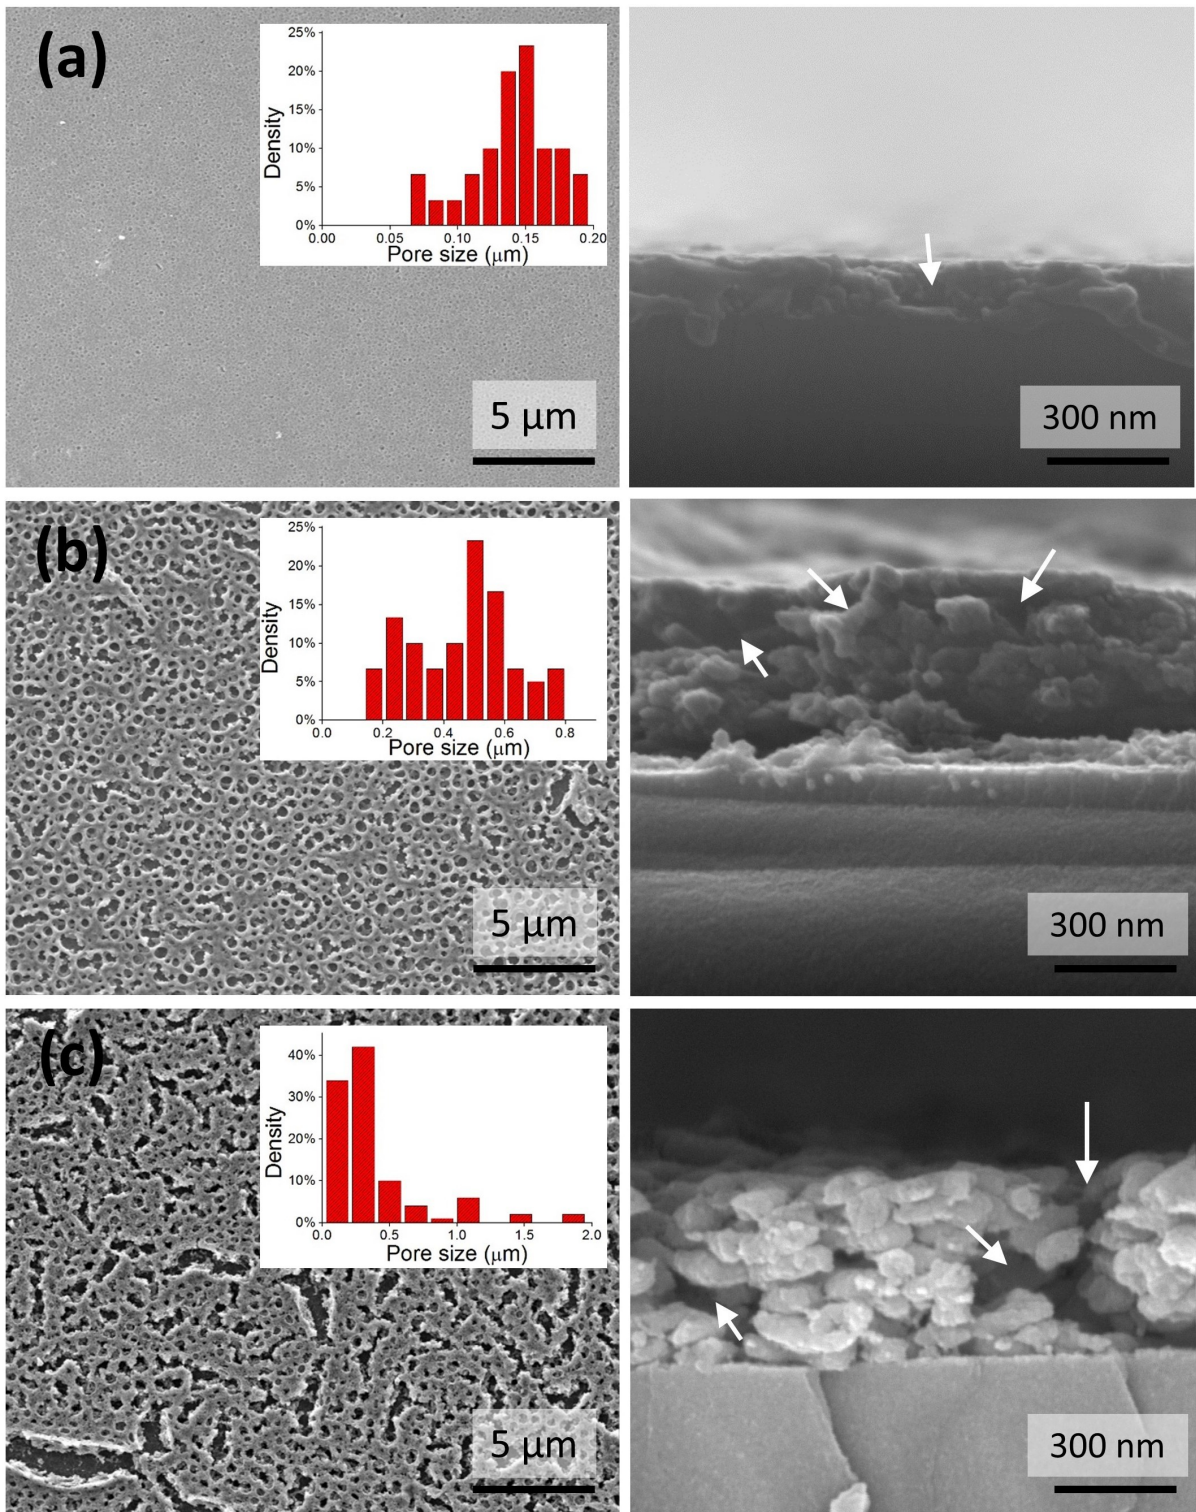

**Fig. S3.** SEM images showing the surface (left) and cross section view (right) of (a) 1PEG-0PVP-0F127, (b) 1PEG-1PVP-0F127 and (c) 1PEG-1PVP-1F127. Pore size distributions are shown in the insets and the presence of pores are indicated by the white arrows.

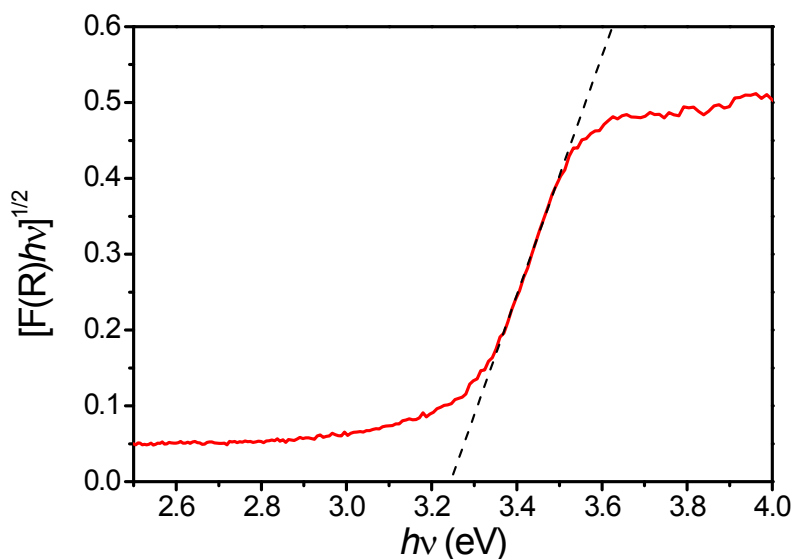

**Fig. S4.** Transformed Kubelka-Munk plot versus energy of the absorbed light ( $h\nu$ ) for powder sample 1PEG-1PVP-1F127 as transformed from the UV-visible diffuse reflectance spectra. In this calculation, the titania material was assumed to be an indirect semiconductor.<sup>1,2</sup> The value of the bandgap energy,  $E_g \sim 3.22$  eV, was estimated by extrapolation of the fitted straight line tangential curve towards the x-axis.

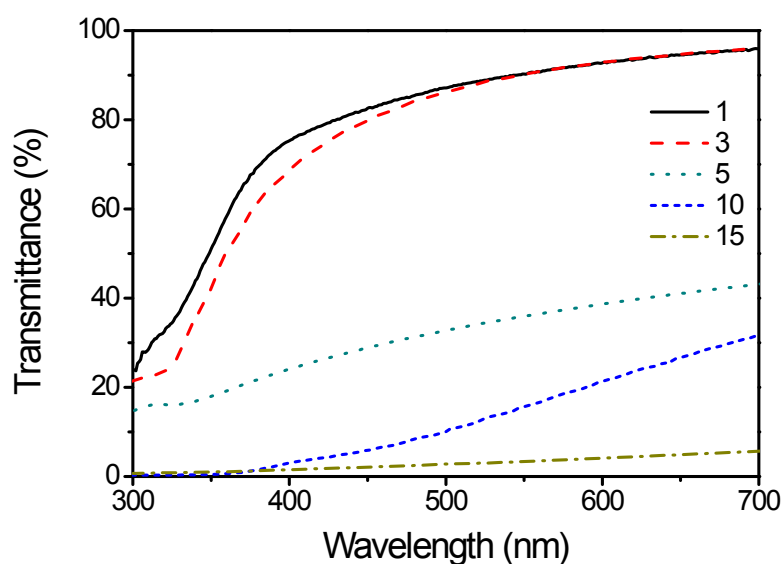

**Fig. S5.** UV/vis transmission spectra of P25 films prepared from P25 slurry spin-coated onto coverslips with 1, 3, 5, 10 or 15 coating cycles.



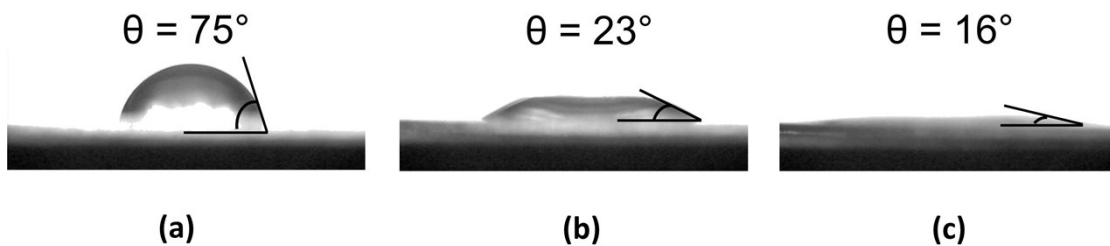

**Fig. S6.** Photographic images of water droplets 2 min after contact with the surface of the (a) blank coverslip, (b) control or 1PEG-0PVP-0F127 (the image is typical for both) and (c) 1PEG-1PVP-1F127.

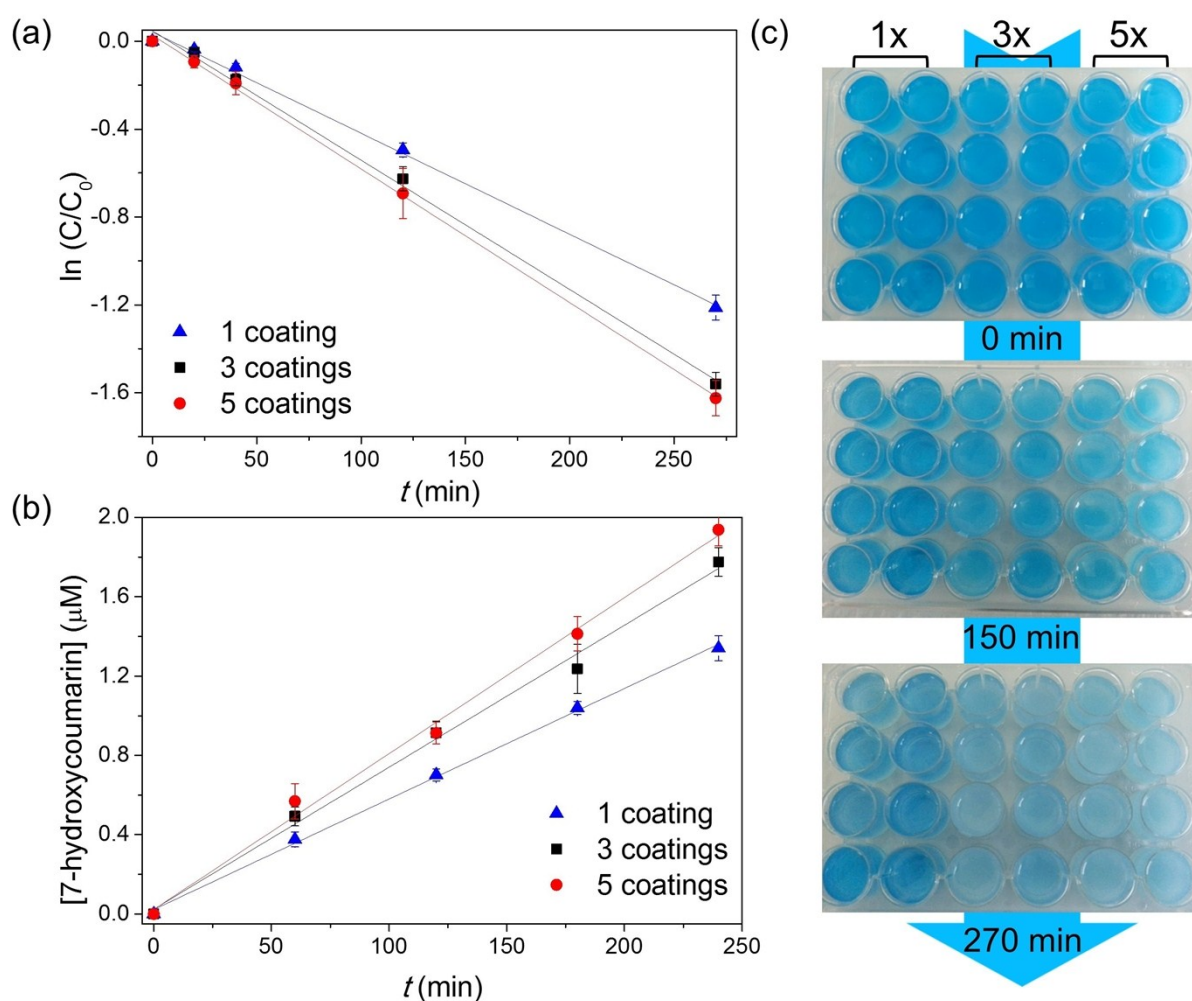

**Fig. S7** Photocatalytic activity of P25 films with different numbers of coatings as shown by the (a) photodegradation of MB, (b) concentration of 7-hydroxycoumarin, and (c) photographs of MB decolouration following irradiation at certain time (the number of coatings is indicated at the top column of wells).

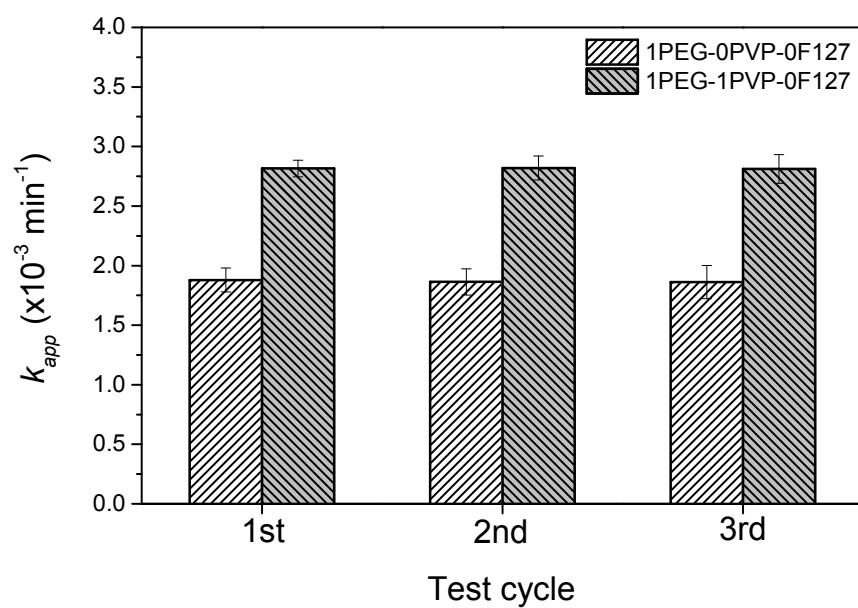

**Fig. S8** Repeated MB photodegradation tests under UV light for 1PEG-0PVP-0F127 and 1PEG-1PVP-0F127.

## References

1. B. Karvaly and I. Hevesi, *Naturforsch. Teil A*, 1971, **A 26**, 245.
2. J. Tauc, Grigorov.R and A. Vancu, *Phys. Status Solidi*, 1966, **15**, 627.
